# Supplementary material for: MicroRNAs Associated with Chronic Mucus Hypersecretion in COPD Are Involved in Fibroblast–Epithelium Crosstalk
Source: MDPI journal article supplement (doi:10.3390/cells11030526), 2022-02-02
Supplement: s1 [file s1]

# MicroRNAs Associated with Chronic Mucus Hypersecretion in COPD Are Involved in Fibroblast–Epithelium Crosstalk

Hataitip Tasena <sup>1,2,3,4</sup>, Wim Timens <sup>1,2</sup>, Maarten van den Berge <sup>2,5</sup>, Joy van Broekhuizen <sup>1,2</sup>, Brian K. Kennedy <sup>3,4,6,7</sup>, Machteld N. Hylkema <sup>1,2,†</sup>, Corry-Anke Brandsma <sup>1,2,†</sup> and Irene H. Heijink <sup>1,2,5,\*</sup>

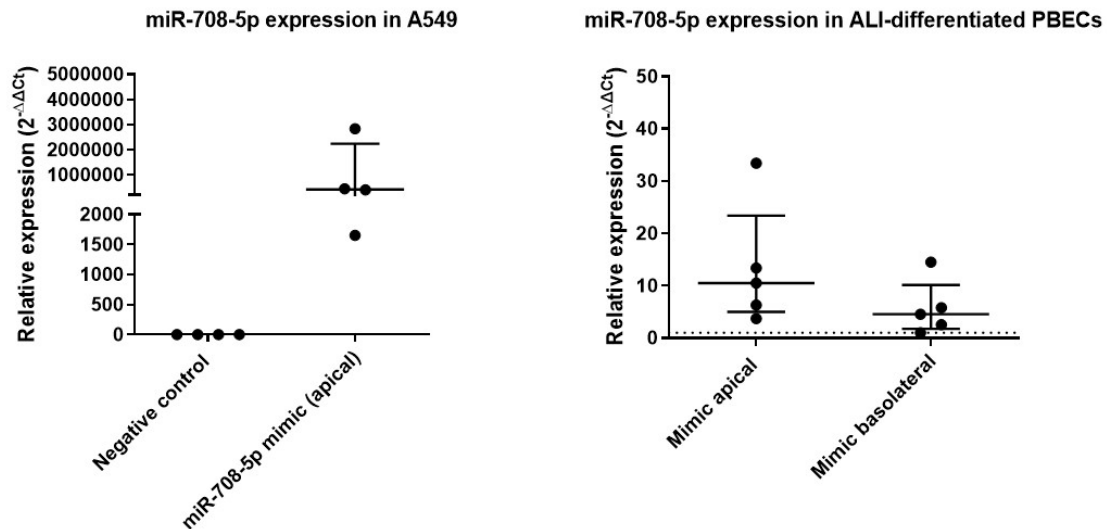

**Figure S1. miR-708-5p expression upon transfection with miR-708-5p mimic in A549 and air-liquid interface (ALI)-cultured primary bronchial epithelial cells (PBECs).** A549 cells or PBECs cultured at ALI for 14 days were transfected with miR-708-5p mimic either from the apical (1 nM) or the basolateral (3 nM) side. The expression of miR-708 was normalized to RNU48 and related to the negative control ( $2^{-\Delta\Delta C_t}$ ). Four-five experiments were performed independently.

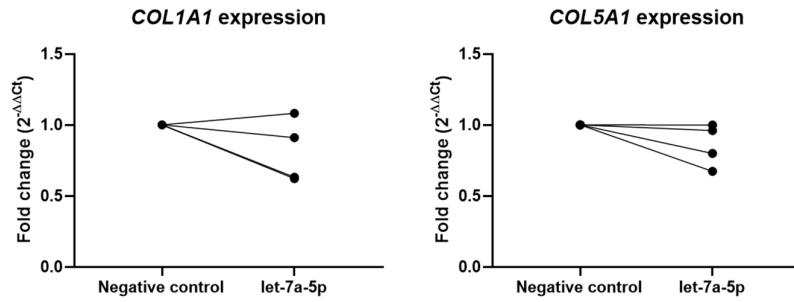

**Figure S2. Effect of let-7a-5p overexpression on *COL1A1* and *COL5A1* expression in normal human lung fibroblasts (NHLFs).** NHLFs were seeded in 24-well plates and transfected with let-7a-5p mimic or negative control siRNA (5 nM) were transfected in upon. RNA samples were collected 24 hours after the medium refreshment. The expression if *COL1A1* and *COL5A1* was normalized to *GAPDH*. Four experiments were performed independently.
